# Supplementary material for: Curso práctico sobre el procesamiento de la terminología
Source: Hindawi journal article supplement (doi:10.1155/2022/6202842), 1993-01-01
Supplement: f1 [file 6202842.f1.pdf]

| Primer   | Primer Sequence             |
|----------|-----------------------------|
| CXCL12-F | TGCCGATTCTTTGAGAGCCATGTC    |
| CXCL12-R | GCAACAATCTGAAGGGCACAGTTTG   |
| FGF2-F   | CAAGCAGAAGAGAGAGGAGTTGTGTC  |
| FGF2-R   | CAGCCGTCCATCTTCCTTCATAGC    |
| VEGF-F   | CACCAAAGCCAGCACATAGGAGAG    |
| VEGF-R   | GTCTGCGGATCTTGACAAACAAATG   |
| NGF-F    | GGCGAGGTGAACATTAACAACAGTG   |
| NGF-R    | GTGTGAGTCGTGGTGCAGTATGAG    |
| HGF-F    | TCAGGACCTTGTGAGGGAGATTATGG  |
| HGF-R    | ACCAGGAACAATGACACCAAGAACC   |
| IGF1-F   | GAGATGTACTGTGCTCCGCTGAAG    |
| IGF1-R   | AGTGTACTTCCTTTCCTTCTCCTTTGC |
| GAPDH-F  | CCACCAACTGCTTAGCCCCC        |
| GAPDH-R  | GCAGTGATGGCATGGACTGTGG      |

**Supplementary Table 1** Primers used for qRT-PCR.

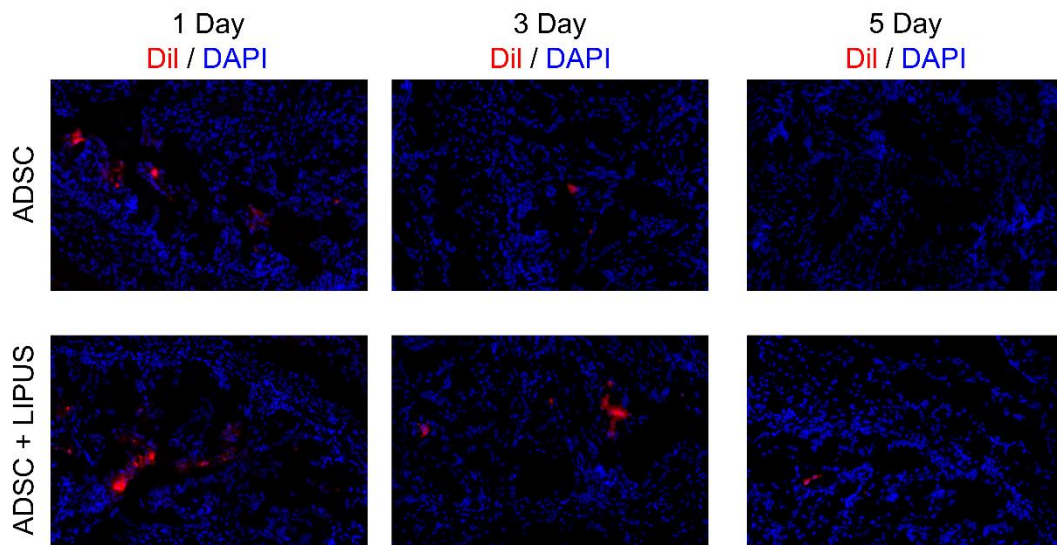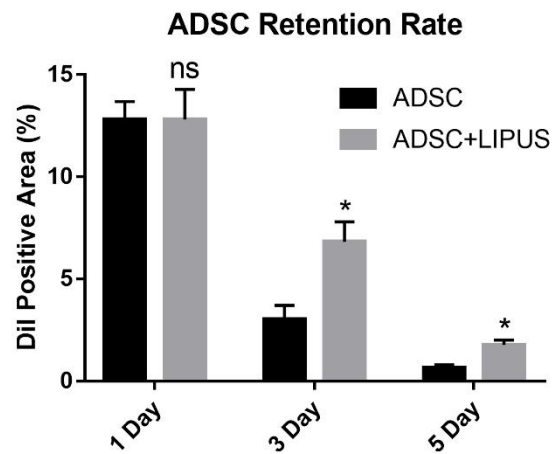

**Supplementary Figure 1** The fate of transplanted ADSCs. No significant differences in the number of resident stem cells were observed one day after the transplantation. 3 and 5 days later, more ADSCs were retained in the cavernosum in the LIPUS treatment group. Data are presented as the mean  $\pm$  standard deviation. ns  $p > 0.05$  when comparing the ADSC group on the first day. \*  $p < 0.05$  when comparing the ADSC group on the third and fifth days.

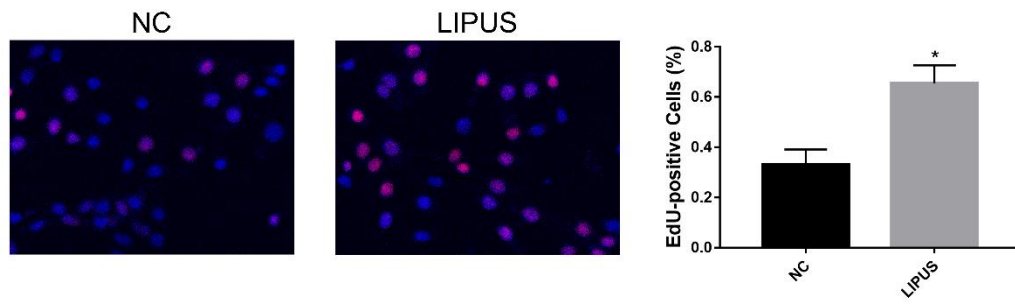

**Supplementary Figure 2** The EdU staining of ADSCs. The percentage of EdU-positive cells in the LIPUS treatment group was significantly higher than that in the NC group. Data are presented as the mean  $\pm$  standard deviation. \*  $p < 0.05$  when comparing the NC group.

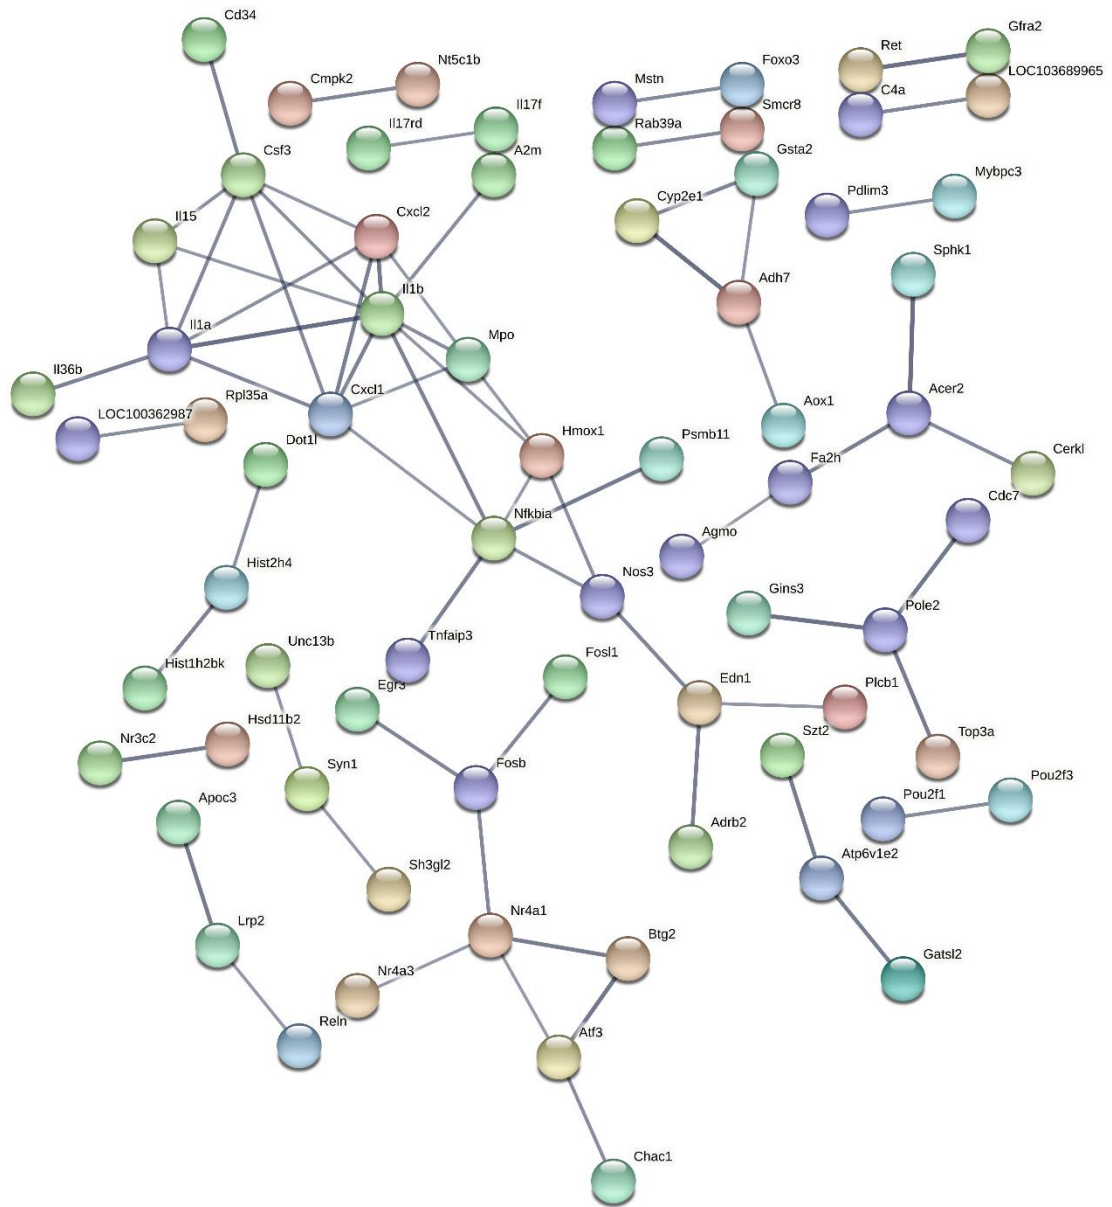

**Supplementary Figure 3** The protein–protein interaction network of DEGs of ADSCs without and with LIPUS stimulation.
